# Supplementary material
Source: HighWire-hosted journal article supplement (https://www.genetics.org/content/suppl/2015/04/24/genetics.115.175380)
Supplement: FigureS2.pdf [file FigureS2.pdf]

**Figure S2**

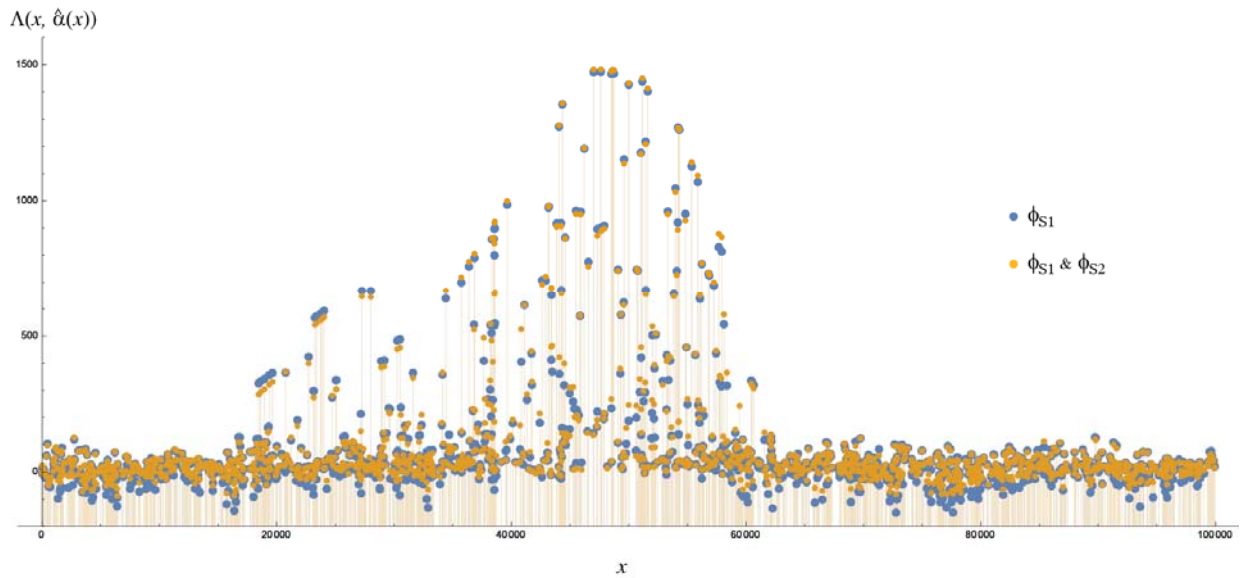

**Figure S2 legend:** Composite likelihood ratio calculated for a simulated data set of 20 DNA sequences of 100kb long ( $R = 4,000$ ). Advantageous mutation with  $\alpha = 4,000$  is located in the middle (50kb). Blue dots are CLR calculated using  $\phi_{S1}$ , approximation suggested by Nielsen et al. (2005), and yellow dots are CLR calculated using  $\phi_{S1}$  for  $r/s < 0.03$  but  $\phi_{S2}$ , approximation based on Etheridge et al. (2006), for  $r/s \geq 0.03$ .
